# Supplementary material for: How can competencies in minor surgery in general practice be increased? Assessing the effect of a compact intervention in postgraduate training: a mixed-methodsstudy
Source: HighWire-hosted journal article supplement (doi:10.1136/bmjopen-2022-060991), 2022-07-01

## Verletzungen in der hausärztlichen Praxis

### Selbsteinschätzungsbogen für Ärztinnen/Ärzte in Weiterbildung

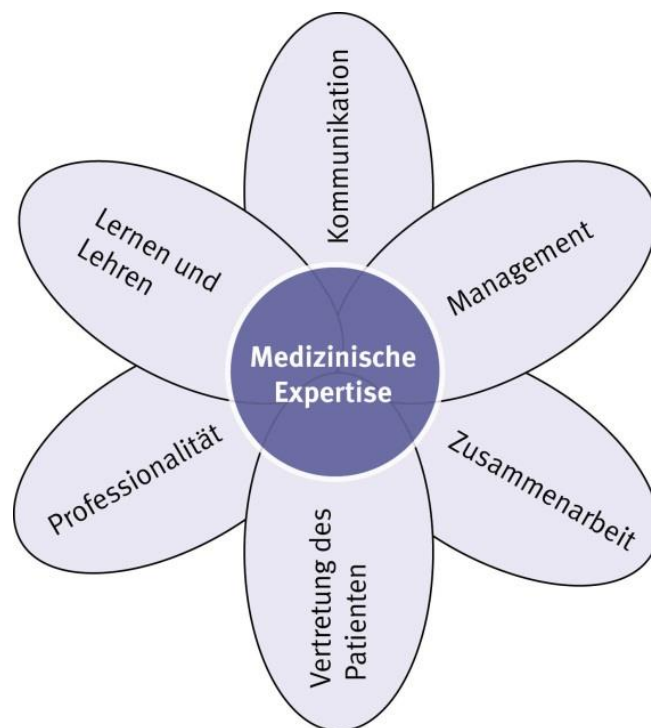

## UniversitätsKlinikum Heidelberg

Bitte trage hier dein **sechsstelliges** Pseudonym ein.

| Erster Buchstabe des<br>Vornamens deiner Mutter | Zweiter Buchstabe des<br>Vornamens deiner Mutter | Erster Buchstabe<br>deines Geburtsorts | Zweiter Buchstabe<br>deines Geburtsorts | Tageszahl deines Geburtstages<br>(z.B. 7. Oktober 1984 = 07) |   |
|-------------------------------------------------|--------------------------------------------------|----------------------------------------|-----------------------------------------|--------------------------------------------------------------|---|
| 1                                               | 2                                                | 3                                      | 3b                                      | 4                                                            | 5 |

Liebe Ärztinnen und Ärzte in Weiterbildung,  
bitte gebt in den folgenden Antwortmöglichkeiten an, wie ihr eure **Kompetenzen in der Versorgung von Patienten mit Verletzungen in der hausärztlichen Praxis bzw. in der Organisation der weiteren Versorgung** (z.B. Einweisung in eine Klinik) selbst einschätzt. **Vielen Dank für eure Teilnahme!**

<sup>1</sup>Vorab: **Begriffsdefinition „Kleine Chirurgie“:** Kleinchirurgische Eingriffe wie z.B. Abszess-Eröffnung oder primäre Wundversorgung mittels Naht

| Als wie <b>sinnvoll</b> erachtest du...                     |                                                                                                                                | Gar nicht sinnvoll    |                       |                       |                       |                       | sehr sinnvoll         |                       |                       |                       |                       |
|-------------------------------------------------------------|--------------------------------------------------------------------------------------------------------------------------------|-----------------------|-----------------------|-----------------------|-----------------------|-----------------------|-----------------------|-----------------------|-----------------------|-----------------------|-----------------------|
| 1                                                           | eine Rotation in einem chirurgischen Fach in der Weiterbildung zum Facharzt Allgemeinmedizin?                                  | <input type="radio"/> | <input type="radio"/> | <input type="radio"/> | <input type="radio"/> | <input type="radio"/> | <input type="radio"/> | <input type="radio"/> | <input type="radio"/> | <input type="radio"/> | <input type="radio"/> |
| 2                                                           | eine <b>verpflichtende</b> Rotation in einem chirurgischen Fach in der Weiterbildung zum Facharzt Allgemeinmedizin?            | <input type="radio"/> | <input type="radio"/> | <input type="radio"/> | <input type="radio"/> | <input type="radio"/> | <input type="radio"/> | <input type="radio"/> | <input type="radio"/> | <input type="radio"/> | <input type="radio"/> |
| Als wie hoch würdest du dein <b>Interesse</b> bezeichnen... |                                                                                                                                | Gar kein              |                       |                       |                       |                       | sehr hoch             |                       |                       |                       |                       |
| 3                                                           | an chirurgischen Inhalten ( <b>allgemein</b> )?                                                                                | <input type="radio"/> | <input type="radio"/> | <input type="radio"/> | <input type="radio"/> | <input type="radio"/> | <input type="radio"/> | <input type="radio"/> | <input type="radio"/> | <input type="radio"/> | <input type="radio"/> |
| 4                                                           | an chirurgischen Inhalten <b>in der Hausarztpraxis</b> (sog. kleine Chirurgie <sup>1</sup> )?                                  | <input type="radio"/> | <input type="radio"/> | <input type="radio"/> | <input type="radio"/> | <input type="radio"/> | <input type="radio"/> | <input type="radio"/> | <input type="radio"/> | <input type="radio"/> | <input type="radio"/> |
| 5                                                           | deine Weiterbildung in einer Hausarztpraxis zu absolvieren, in der regelmäßig kleine Chirurgie <sup>1</sup> durchgeführt wird? | <input type="radio"/> | <input type="radio"/> | <input type="radio"/> | <input type="radio"/> | <input type="radio"/> | <input type="radio"/> | <input type="radio"/> | <input type="radio"/> | <input type="radio"/> | <input type="radio"/> |
| 6                                                           | selbst in deiner zukünftigen Tätigkeit als Hausarzt/Hausärztin auch sog. kleine Chirurgie <sup>1</sup> durchzuführen?          | <input type="radio"/> | <input type="radio"/> | <input type="radio"/> | <input type="radio"/> | <input type="radio"/> | <input type="radio"/> | <input type="radio"/> | <input type="radio"/> | <input type="radio"/> | <input type="radio"/> |

|   |                                                                                                                                  |                       |                       |                       |                       |                       |                       |                       |                       |                       |                       |
|---|----------------------------------------------------------------------------------------------------------------------------------|-----------------------|-----------------------|-----------------------|-----------------------|-----------------------|-----------------------|-----------------------|-----------------------|-----------------------|-----------------------|
| 7 | Wie schätzt du deine <b>Kompetenzen</b> in der <b>ambulanten</b> Versorgung chirurgischer Krankheitsbilder <b>insgesamt</b> ein? | keine                 |                       |                       |                       |                       | sehr gut              |                       |                       |                       |                       |
|   |                                                                                                                                  | <input type="radio"/> | <input type="radio"/> | <input type="radio"/> | <input type="radio"/> | <input type="radio"/> | <input type="radio"/> | <input type="radio"/> | <input type="radio"/> | <input type="radio"/> | <input type="radio"/> |

| Wie schätzt du deine Kompetenzen ein, bei <b>Patienten mit Trauma</b> folgende Körperregionen zu <b>untersuchen</b> : |                   | keine                 |                       |                       |                       |                       | sehr gut              |                       |                       |                       |                       |
|-----------------------------------------------------------------------------------------------------------------------|-------------------|-----------------------|-----------------------|-----------------------|-----------------------|-----------------------|-----------------------|-----------------------|-----------------------|-----------------------|-----------------------|
| 8                                                                                                                     | Schultergelenk    | <input type="radio"/> | <input type="radio"/> | <input type="radio"/> | <input type="radio"/> | <input type="radio"/> | <input type="radio"/> | <input type="radio"/> | <input type="radio"/> | <input type="radio"/> | <input type="radio"/> |
| 9                                                                                                                     | Ellenbogengelenk  | <input type="radio"/> | <input type="radio"/> | <input type="radio"/> | <input type="radio"/> | <input type="radio"/> | <input type="radio"/> | <input type="radio"/> | <input type="radio"/> | <input type="radio"/> | <input type="radio"/> |
| 10                                                                                                                    | Handgelenk        | <input type="radio"/> | <input type="radio"/> | <input type="radio"/> | <input type="radio"/> | <input type="radio"/> | <input type="radio"/> | <input type="radio"/> | <input type="radio"/> | <input type="radio"/> | <input type="radio"/> |
| 11                                                                                                                    | Fingergelenke     | <input type="radio"/> | <input type="radio"/> | <input type="radio"/> | <input type="radio"/> | <input type="radio"/> | <input type="radio"/> | <input type="radio"/> | <input type="radio"/> | <input type="radio"/> | <input type="radio"/> |
| 12                                                                                                                    | Hüftgelenk        | <input type="radio"/> | <input type="radio"/> | <input type="radio"/> | <input type="radio"/> | <input type="radio"/> | <input type="radio"/> | <input type="radio"/> | <input type="radio"/> | <input type="radio"/> | <input type="radio"/> |
| 13                                                                                                                    | Kniegelenk        | <input type="radio"/> | <input type="radio"/> | <input type="radio"/> | <input type="radio"/> | <input type="radio"/> | <input type="radio"/> | <input type="radio"/> | <input type="radio"/> | <input type="radio"/> | <input type="radio"/> |
| 14                                                                                                                    | Sprunggelenke     | <input type="radio"/> | <input type="radio"/> | <input type="radio"/> | <input type="radio"/> | <input type="radio"/> | <input type="radio"/> | <input type="radio"/> | <input type="radio"/> | <input type="radio"/> | <input type="radio"/> |
| 15                                                                                                                    | Halswirbelsäule   | <input type="radio"/> | <input type="radio"/> | <input type="radio"/> | <input type="radio"/> | <input type="radio"/> | <input type="radio"/> | <input type="radio"/> | <input type="radio"/> | <input type="radio"/> | <input type="radio"/> |
| 16                                                                                                                    | Brustwirbelsäule  | <input type="radio"/> | <input type="radio"/> | <input type="radio"/> | <input type="radio"/> | <input type="radio"/> | <input type="radio"/> | <input type="radio"/> | <input type="radio"/> | <input type="radio"/> | <input type="radio"/> |
| 17                                                                                                                    | Lendenwirbelsäule | <input type="radio"/> | <input type="radio"/> | <input type="radio"/> | <input type="radio"/> | <input type="radio"/> | <input type="radio"/> | <input type="radio"/> | <input type="radio"/> | <input type="radio"/> | <input type="radio"/> |

## UniversitätsKlinikum Heidelberg

| Beurteile deine <b>Kompetenzen</b> in: |                                                                 | keine                 |                       |                       | sehr gut              |                       |
|----------------------------------------|-----------------------------------------------------------------|-----------------------|-----------------------|-----------------------|-----------------------|-----------------------|
| 18                                     | Einschätzung von Wundverhältnissen                              | <input type="radio"/> | <input type="radio"/> | <input type="radio"/> | <input type="radio"/> | <input type="radio"/> |
| 19                                     | Behandlung akuter Wunden                                        | <input type="radio"/> | <input type="radio"/> | <input type="radio"/> | <input type="radio"/> | <input type="radio"/> |
| 20                                     | Behandlung chronischer Wunden                                   | <input type="radio"/> | <input type="radio"/> | <input type="radio"/> | <input type="radio"/> | <input type="radio"/> |
| 21                                     | Behandlung infizierter Wunden                                   | <input type="radio"/> | <input type="radio"/> | <input type="radio"/> | <input type="radio"/> | <input type="radio"/> |
| 22                                     | Versorgung von Frakturen <b>postoperativ</b>                    | <input type="radio"/> | <input type="radio"/> | <input type="radio"/> | <input type="radio"/> | <input type="radio"/> |
| 23                                     | Allgemeine Dokumentation von Verletzungen                       | <input type="radio"/> | <input type="radio"/> | <input type="radio"/> | <input type="radio"/> | <input type="radio"/> |
| 24                                     | Beurteilung notwendiger Impfungen bei Verletzungen              | <input type="radio"/> | <input type="radio"/> | <input type="radio"/> | <input type="radio"/> | <input type="radio"/> |
| 25                                     | Kenntnis der Besonderheiten eines BG Falles                     | <input type="radio"/> | <input type="radio"/> | <input type="radio"/> | <input type="radio"/> | <input type="radio"/> |
| 26                                     | Verordnung von Hilfs- und Heilmitteln                           | <input type="radio"/> | <input type="radio"/> | <input type="radio"/> | <input type="radio"/> | <input type="radio"/> |
| 27                                     | Organisation ggf. notwendiger pflegerischer Versorgung zu Hause | <input type="radio"/> | <input type="radio"/> | <input type="radio"/> | <input type="radio"/> | <input type="radio"/> |

| Wie schätzt du deine Kompetenzen in der <b>akuten Versorgung</b> folgender Krankheitsbilder hinsichtlich der <b>Einleitung einer adäquaten Therapie</b> ein? |                                     | keine                 |                       |                       | sehr gut              |                       |
|--------------------------------------------------------------------------------------------------------------------------------------------------------------|-------------------------------------|-----------------------|-----------------------|-----------------------|-----------------------|-----------------------|
| 28                                                                                                                                                           | Prellungen                          | <input type="radio"/> | <input type="radio"/> | <input type="radio"/> | <input type="radio"/> | <input type="radio"/> |
| 29                                                                                                                                                           | Distorsionen                        | <input type="radio"/> | <input type="radio"/> | <input type="radio"/> | <input type="radio"/> | <input type="radio"/> |
| 30                                                                                                                                                           | Luxationen                          | <input type="radio"/> | <input type="radio"/> | <input type="radio"/> | <input type="radio"/> | <input type="radio"/> |
| 31                                                                                                                                                           | Bissverletzungen                    | <input type="radio"/> | <input type="radio"/> | <input type="radio"/> | <input type="radio"/> | <input type="radio"/> |
| 32                                                                                                                                                           | Fremdkörperverletzungen             | <input type="radio"/> | <input type="radio"/> | <input type="radio"/> | <input type="radio"/> | <input type="radio"/> |
| 33                                                                                                                                                           | Verbrennungen                       | <input type="radio"/> | <input type="radio"/> | <input type="radio"/> | <input type="radio"/> | <input type="radio"/> |
| 34                                                                                                                                                           | Frakturen                           | <input type="radio"/> | <input type="radio"/> | <input type="radio"/> | <input type="radio"/> | <input type="radio"/> |
| 35                                                                                                                                                           | Schädelhirntraumata                 | <input type="radio"/> | <input type="radio"/> | <input type="radio"/> | <input type="radio"/> | <input type="radio"/> |
| 36                                                                                                                                                           | Verletzungen durch häusliche Gewalt | <input type="radio"/> | <input type="radio"/> | <input type="radio"/> | <input type="radio"/> | <input type="radio"/> |

|     |                                                                                                                |                                                                                                                                                                                                                                                                     |
|-----|----------------------------------------------------------------------------------------------------------------|---------------------------------------------------------------------------------------------------------------------------------------------------------------------------------------------------------------------------------------------------------------------|
| 37  | Hast du eine Rotation in die Chirurgie absolviert oder arbeitest aktuell in einer chirurgischen Fachabteilung? | <input type="checkbox"/> ja<br><input type="checkbox"/> nein                                                                                                                                                                                                        |
| 37a | Wenn ja, in welcher/n chirurgische/n Fachabteilung/en warst bzw. bist du tätig? (Mehrfachnennung möglich)      | <input type="checkbox"/> Orthopädie/ Unfallchirurgie<br><input type="checkbox"/> Allgemein-/Viszeralchirurgie<br><input type="checkbox"/> Thorax Chirurgie<br><input type="checkbox"/> Herzchirurgie<br><input type="checkbox"/> sonstiges ( bitte Freitext nutzen) |
|     | <i>Freitext:</i>                                                                                               |                                                                                                                                                                                                                                                                     |
| 37b | Wenn ja, wo warst bzw. bist du chirurgisch tätig? (Mehrfachnennung möglich)                                    | <input type="checkbox"/> stationär <input type="checkbox"/> ambulant                                                                                                                                                                                                |
| 37c | Wenn ja, wie lange warst du insgesamt chirurgisch tätig bzw. wirst du voraussichtlich tätig sein?              | <input type="checkbox"/> bis 3 Monate<br><input type="checkbox"/> 4-6 Monate<br><input type="checkbox"/> 7-12 Monate<br><input type="checkbox"/> mehr als 12 Monate                                                                                                 |

Evaluation der KWBWB Verbundweiterbildung<sup>plus</sup> – Kohortenstudie – Verletzungen – 13.02.2019 - Vers. 2 - DR/Swl  
 Universitätsklinikum Heidelberg, Abt. Allgemeinmedizin und Versorgungsforschung, Marsilius-Arkaden, INF 130.3, Turm West,  
 69120 Heidelberg // Ansprechpartner: Dr. Simon Schwill (simon.schwill@med.uni-heidelberg.de) **Bogen Nr. «M\_001»**

## UniversitätsKlinikum Heidelberg

|     |                                                                       |                                                              |
|-----|-----------------------------------------------------------------------|--------------------------------------------------------------|
| 38  | Für Quereinsteiger: Ich bin Facharzt in einer chirurgischen Disziplin | <input type="checkbox"/> ja<br><input type="checkbox"/> nein |
| 38a | Wenn ja, in welcher chirurg. Fachdisziplin?                           | <i>Freitext:</i>                                             |

|     |                                                                                                                                           |                                                              |
|-----|-------------------------------------------------------------------------------------------------------------------------------------------|--------------------------------------------------------------|
| 39  | Hast Du außerhalb des Studiums oder der Facharztweiterbildung chirurgische Erfahrungen gesammelt? (z.B. Rettungsdienst oder Pflegedienst) | <input type="checkbox"/> ja<br><input type="checkbox"/> nein |
| 39a | Wenn ja, wo hast du chirurgische Erfahrungen gesammelt?                                                                                   | <i>Freitext:</i>                                             |

|    |                                                       |                                                                                       |
|----|-------------------------------------------------------|---------------------------------------------------------------------------------------|
| 40 | Dein Geschlecht?                                      | <input type="checkbox"/> w <input type="checkbox"/> m <input type="checkbox"/> divers |
| 41 | Wann bist du geboren?                                 | <input type="text"/> /19 <input type="text"/> Monat/Jahr<br>(z.B. 05/1986)            |
| 42 | In welchem Jahr der Weiterbildung befindest du dich?  | <input type="text"/> (1 bis 5 Vollzeit-Äquivalent)                                    |
| 43 | In welchem Weiterbildungsabschnitt befindest du dich? | <input type="checkbox"/> stationär <input type="checkbox"/> ambulant                  |

|                                                                                                                  |                 |
|------------------------------------------------------------------------------------------------------------------|-----------------|
| Hast du noch Anmerkungen zu oder Vorschläge für den Fragebogen <b>Verletzungen in der hausärztlichen Praxis?</b> | <i>Freitext</i> |
|------------------------------------------------------------------------------------------------------------------|-----------------|

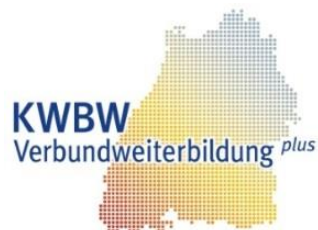

Supplement: bmjopen-2022-060991supp002_data_supplement.pdf [file bmjopen-2022-060991supp002_data_supplement.pdf]
