# Supplementary material for: How can competencies in minor surgery in general practice be increased? Assessing the effect of a compact intervention in postgraduate training: a mixed-methodsstudy
Source: HighWire-hosted journal article supplement (doi:10.1136/bmjopen-2022-060991), 2022-07-01

## NACHBEFRAGUNG Verletzungen in der hausärztlichen Praxis

Selbsteinschätzungsbogen für Ärztinnen/Ärzte in Weiterbildung

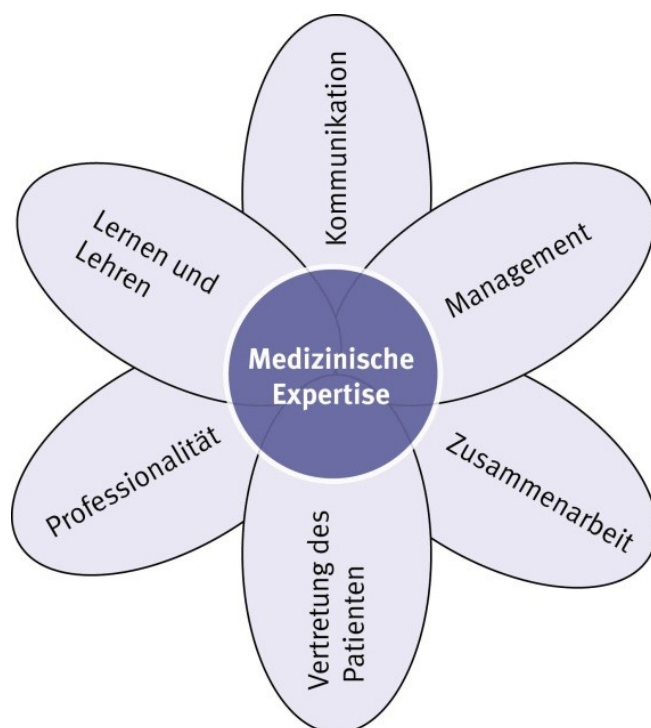

## UniversitätsKlinikum Heidelberg

Bitte trage hier dein **sechstelliges** Pseudonym ein.

| Erster Buchstabe des<br>Vornamens deiner Mutter | Zweiter Buchstabe des<br>Vornamens deiner Mutter | Erster Buchstabe<br>deines Geburtsorts | Zweiter Buchstabe<br>deines Geburtsorts | Tageszahl deines Geburtstages<br>(z.B. 7. Oktober 1984 = 07) |   |
|-------------------------------------------------|--------------------------------------------------|----------------------------------------|-----------------------------------------|--------------------------------------------------------------|---|
| 1                                               | 2                                                | 3                                      | 3b                                      | 4                                                            | 5 |

Liebe Ärztinnen und Ärzte in Weiterbildung,  
bitte gebt in den folgenden Antwortmöglichkeiten an, wie ihr eure **Kompetenzen in der Versorgung von Patienten mit Verletzungen in der hausärztlichen Praxis bzw. in der Organisation der weiteren Versorgung** (z.B. Einweisung in eine Klinik) selbst einschätzt. **Vielen Dank für eure Teilnahme!**

<sup>1</sup>Vorab: **Begriffsdefinition „Kleine Chirurgie“:** Kleinchirurgische Eingriffe wie z.B. Abszess-Eröffnung oder primäre Wundversorgung mittels Naht

| Als wie <b>sinnvoll</b> erachtest du...                     |                                                                                                                                      | Gar nicht sinnvoll    |                       |                       |                       |                       | sehr sinnvoll         |                       |                       |                       |                       |
|-------------------------------------------------------------|--------------------------------------------------------------------------------------------------------------------------------------|-----------------------|-----------------------|-----------------------|-----------------------|-----------------------|-----------------------|-----------------------|-----------------------|-----------------------|-----------------------|
| 1                                                           | eine Rotation in einem chirurgischen Fach in der Weiterbildung zum Facharzt Allgemeinmedizin?                                        | <input type="radio"/> | <input type="radio"/> | <input type="radio"/> | <input type="radio"/> | <input type="radio"/> | <input type="radio"/> | <input type="radio"/> | <input type="radio"/> | <input type="radio"/> | <input type="radio"/> |
| 2                                                           | eine <b>verpflichtende</b> Rotation in einem chirurgischen Fach in der Weiterbildung zum Facharzt Allgemeinmedizin?                  | <input type="radio"/> | <input type="radio"/> | <input type="radio"/> | <input type="radio"/> | <input type="radio"/> | <input type="radio"/> | <input type="radio"/> | <input type="radio"/> | <input type="radio"/> | <input type="radio"/> |
| Als wie hoch würdest du dein <b>Interesse</b> bezeichnen... |                                                                                                                                      | Gar kein              |                       |                       |                       |                       | sehr hoch             |                       |                       |                       |                       |
| 3                                                           | an chirurgischen Inhalten ( <b>allgemein</b> )?                                                                                      | <input type="radio"/> | <input type="radio"/> | <input type="radio"/> | <input type="radio"/> | <input type="radio"/> | <input type="radio"/> | <input type="radio"/> | <input type="radio"/> | <input type="radio"/> | <input type="radio"/> |
| 4                                                           | an chirurgischen Inhalten <b>in der Hausarztpraxis</b> (sog. kleine Chirurgie <sup>1</sup> )?                                        | <input type="radio"/> | <input type="radio"/> | <input type="radio"/> | <input type="radio"/> | <input type="radio"/> | <input type="radio"/> | <input type="radio"/> | <input type="radio"/> | <input type="radio"/> | <input type="radio"/> |
| 5                                                           | deine Weiterbildung in einer Hausarztpraxis zu absolvieren, in der <b>regelmäßig kleine Chirurgie<sup>1</sup></b> durchgeführt wird? | <input type="radio"/> | <input type="radio"/> | <input type="radio"/> | <input type="radio"/> | <input type="radio"/> | <input type="radio"/> | <input type="radio"/> | <input type="radio"/> | <input type="radio"/> | <input type="radio"/> |
| 6                                                           | selbst in deiner zukünftigen Tätigkeit als Hausarzt/Hausärztin auch sog. kleine Chirurgie <sup>1</sup> durchzuführen?                | <input type="radio"/> | <input type="radio"/> | <input type="radio"/> | <input type="radio"/> | <input type="radio"/> | <input type="radio"/> | <input type="radio"/> | <input type="radio"/> | <input type="radio"/> | <input type="radio"/> |
| 7                                                           | Wie schätzt du deine <b>Kompetenzen</b> in der <b>ambulanten</b> Versorgung chirurgischer Krankheitsbilder <b>insgesamt</b> ein?     | keine                 |                       |                       |                       |                       | sehr gut              |                       |                       |                       |                       |
|                                                             |                                                                                                                                      | <input type="radio"/> | <input type="radio"/> | <input type="radio"/> | <input type="radio"/> | <input type="radio"/> | <input type="radio"/> | <input type="radio"/> | <input type="radio"/> | <input type="radio"/> | <input type="radio"/> |

| Als wie hoch würdest du deine <b>Zustimmung</b> zu folgenden Aussagen bewerten? <b>Durch den Doppelseminarstag 2019...</b> |                                                                                                                          | Gar keine             |                       |                       |                       |                       | sehr hoch             |                       |                       |                       |                       |
|----------------------------------------------------------------------------------------------------------------------------|--------------------------------------------------------------------------------------------------------------------------|-----------------------|-----------------------|-----------------------|-----------------------|-----------------------|-----------------------|-----------------------|-----------------------|-----------------------|-----------------------|
| 8                                                                                                                          | ...fühle ich mich <b>sicherer</b> in der Versorgung von Patienten mit Verletzungen.                                      | <input type="radio"/> | <input type="radio"/> | <input type="radio"/> | <input type="radio"/> | <input type="radio"/> | <input type="radio"/> | <input type="radio"/> | <input type="radio"/> | <input type="radio"/> | <input type="radio"/> |
| 9                                                                                                                          | ...fühle ich mich <b>kompetenter</b> in der Versorgung von Patienten mit Verletzungen.                                   | <input type="radio"/> | <input type="radio"/> | <input type="radio"/> | <input type="radio"/> | <input type="radio"/> | <input type="radio"/> | <input type="radio"/> | <input type="radio"/> | <input type="radio"/> | <input type="radio"/> |
| 10                                                                                                                         | ...versorge ich Patienten mit Verletzungen <b>eher selbst</b> .                                                          | <input type="radio"/> | <input type="radio"/> | <input type="radio"/> | <input type="radio"/> | <input type="radio"/> | <input type="radio"/> | <input type="radio"/> | <input type="radio"/> | <input type="radio"/> | <input type="radio"/> |
| 11                                                                                                                         | ...halte ich bei Patienten mit Verletzungen <b>seltener Rücksprache</b> mit meinem Weiterbilder / meiner Weiterbilderin. | <input type="radio"/> | <input type="radio"/> | <input type="radio"/> | <input type="radio"/> | <input type="radio"/> | <input type="radio"/> | <input type="radio"/> | <input type="radio"/> | <input type="radio"/> | <input type="radio"/> |
| 12                                                                                                                         | ...hat sich <b>mein Interesse</b> für die <b>Versorgung von Verletzungen</b> in der Hausarztpraxis gesteigert.           | <input type="radio"/> | <input type="radio"/> | <input type="radio"/> | <input type="radio"/> | <input type="radio"/> | <input type="radio"/> | <input type="radio"/> | <input type="radio"/> | <input type="radio"/> | <input type="radio"/> |
| 13                                                                                                                         | ...hat sich <b>mein allgemeines chirurgisches Interesse</b> gesteigert.                                                  | <input type="radio"/> | <input type="radio"/> | <input type="radio"/> | <input type="radio"/> | <input type="radio"/> | <input type="radio"/> | <input type="radio"/> | <input type="radio"/> | <input type="radio"/> | <input type="radio"/> |

## UniversitätsKlinikum Heidelberg

|    |                                                                                                                               |                |   |   |   |   |   |              |
|----|-------------------------------------------------------------------------------------------------------------------------------|----------------|---|---|---|---|---|--------------|
| 14 | Als wie wichtig erachtest du Seminare mit chirurgischen Inhalten innerhalb der ärztlichen Weiterbildung für Allgemeinmedizin? | Sehr unwichtig | ○ | ○ | ○ | ○ | ○ | sehr wichtig |
|----|-------------------------------------------------------------------------------------------------------------------------------|----------------|---|---|---|---|---|--------------|

|    |                                               |
|----|-----------------------------------------------|
| 15 | Was hättest du dir im Seminar noch gewünscht? |
|    | <i>Freitext (stichwortartig)</i>              |

|    |                                                                                    |                                                              |
|----|------------------------------------------------------------------------------------|--------------------------------------------------------------|
| 16 | Hast du seit dem Doppelseminar eine Rotation in einem chirurgischen Fach begonnen? | <input type="checkbox"/> ja<br><input type="checkbox"/> nein |
|----|------------------------------------------------------------------------------------|--------------------------------------------------------------|

|                           |                 |
|---------------------------|-----------------|
| Hast du noch Anmerkungen? | <i>Freitext</i> |
|---------------------------|-----------------|

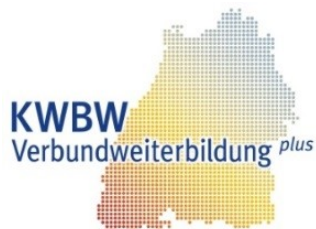

Supplement: bmjopen-2022-060991supp003_data_supplement.pdf [file bmjopen-2022-060991supp003_data_supplement.pdf]
